# Supplementary material for: Liposomal UHRF1 siRNA shows lung fibrosis treatment potential through regulation of fibroblast activation
Source: JCI journal article supplement (doi:10.1172/jci.insight.162831), 2022-09-27
Supplement: sd1 [file 1]

## Revised supplementary materials

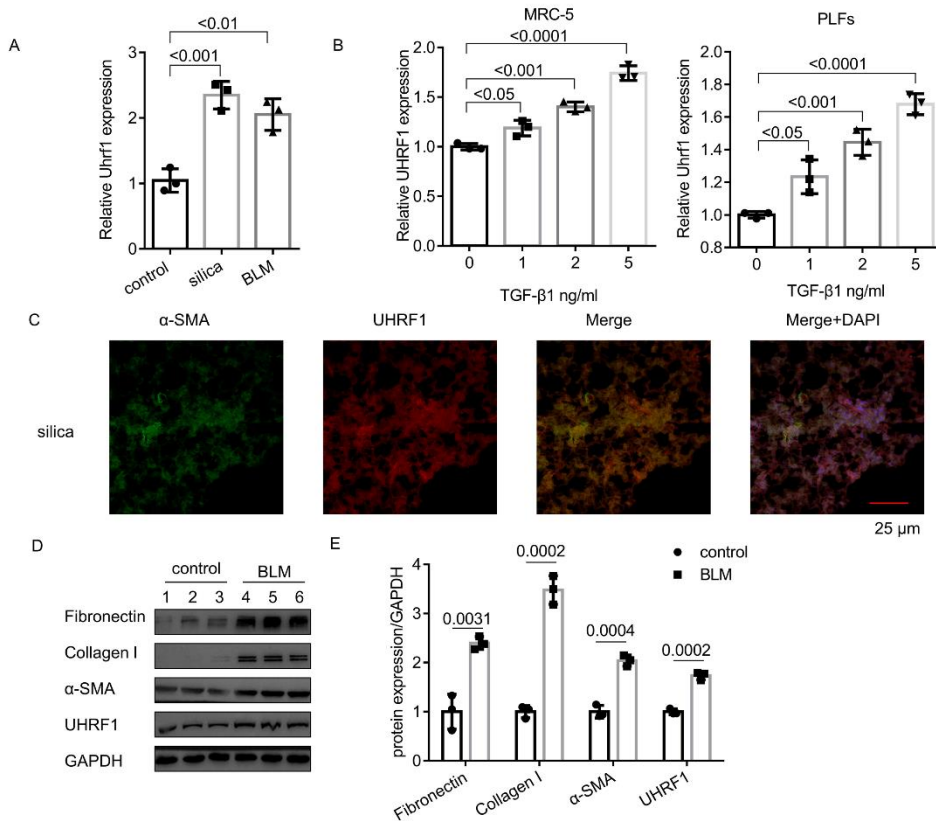

**Fig. S1. UHRF1 is overexpressed in TGF-β1-stimulated fibroblasts and fibrotic lungs.**

(A) qRT-PCR analysis of UHRF1 expression in silica or BLM-treated mouse lung tissues. Data are shown as mean  $\pm$  SEM (n = 3 in each group). (B) qRT-PCR analysis of UHRF1 expression in MRC-5 and PLFs treated with TGF-β1. Data are shown as

mean  $\pm$  SEM ( $n = 3$  in each group). (C) Representative results for co-immunostaining of UHRF1 and  $\alpha$ -SMA in the lung sections treatment with silica. Red represents UHRF1; Green represents  $\alpha$ -SMA; blue represents nuclear DNA staining by DAPI. (D-E) Western blot and densitometric analysis of the protein of Fibronectin, Collagen I,  $\alpha$ -SMA, and UHRF1 in saline or BLM treated mouse lung tissues. Data are shown as mean  $\pm$  SEM ( $n = 3$  in each group). (A-B)  $P$  values were from a one-way ANOVA post hoc test with Tukey correction. (E)  $P$  values were from a two-tailed unpaired Student  $t$ -test.

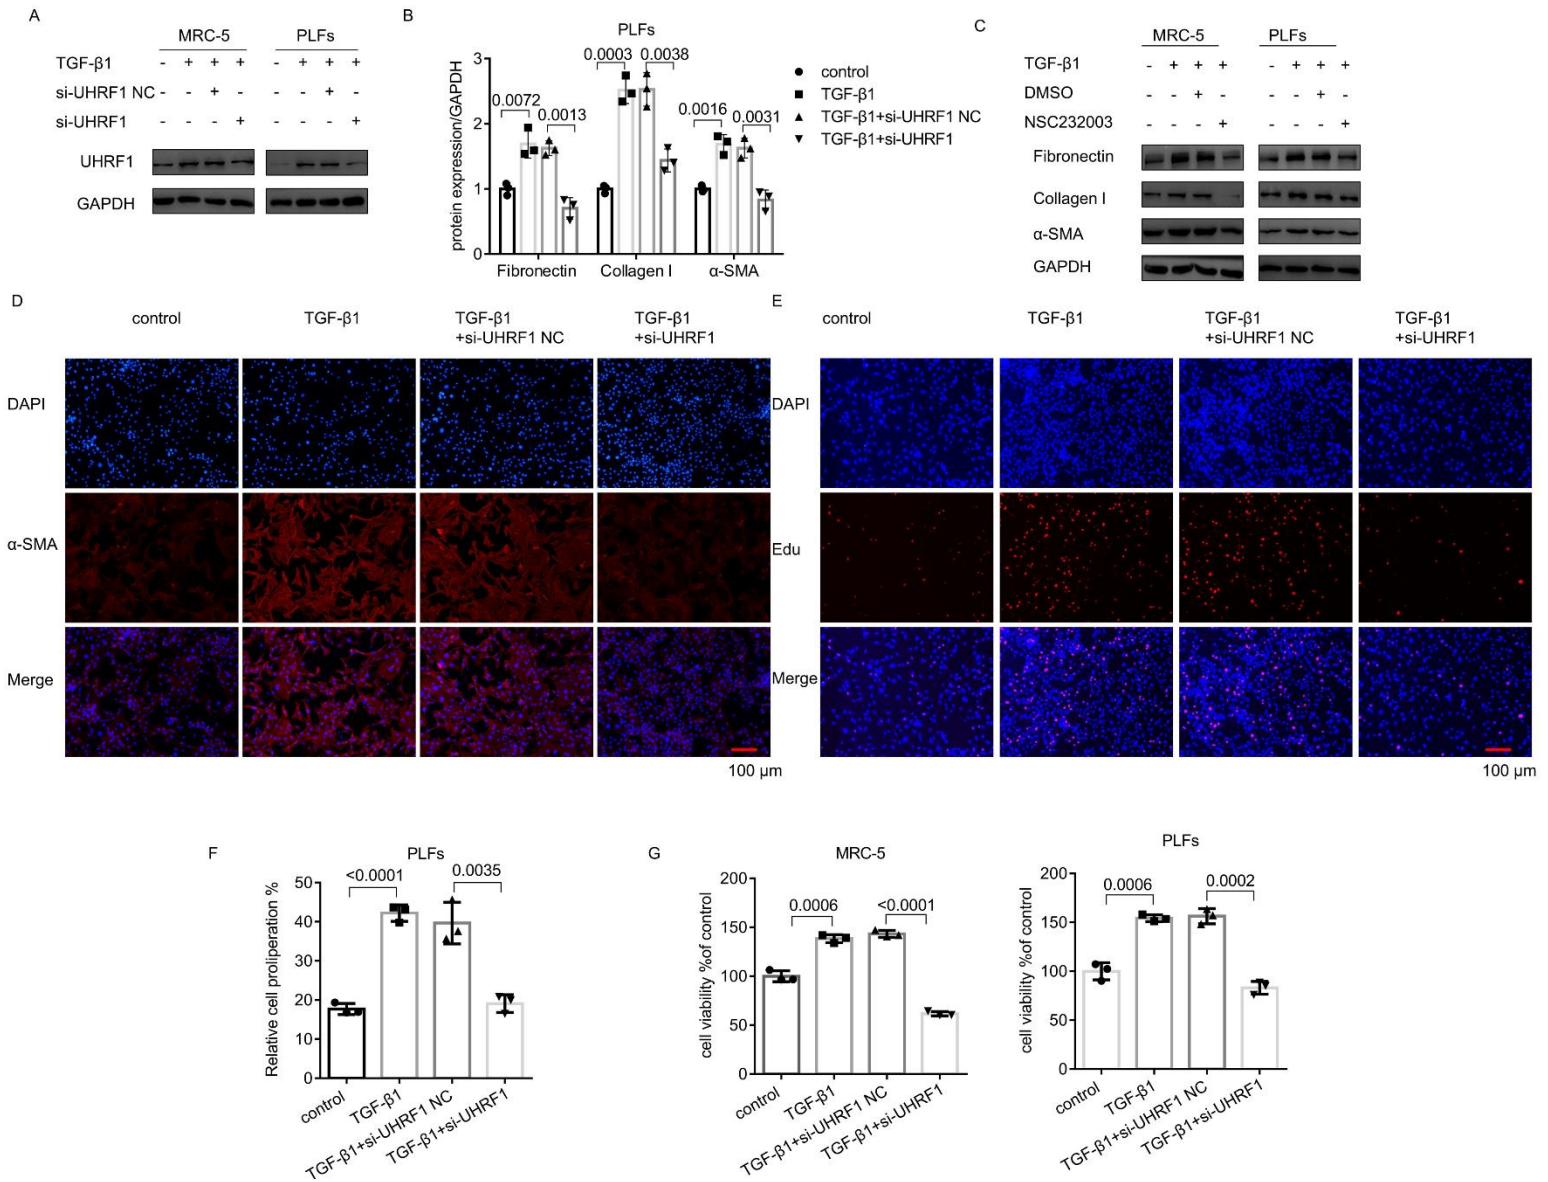

**Fig. S2. UHRF1 regulates TGF- $\beta$ 1-induced lung fibroblast proliferation.**

(A) Western blot of UHRF1 in MRC-5 and PLFs transfected with UHRF1 siRNA, and its negative control (NC) siRNA was then treated with 5 ng/ml TGF- $\beta$ 1 for 48 h. (B) Densitometry analysis of Fibronectin, Collagen I,  $\alpha$ -SMA in PLFs transfected with UHRF1 siRNA, and its negative control (NC) siRNA then treated with 5 ng/ml TGF- $\beta$ 1 for 48 h. Data are shown as mean  $\pm$  SEM (n = 3 in each group). (C) Western blot of Fibronectin, Collagen I,  $\alpha$ -SMA in MRC-5 and PLFs treated with UHRF1 inhibitor NSC232003, and its negative control (NC) then treated with 5 ng/ml TGF- $\beta$ 1 for 48 h. (D) The expression of  $\alpha$ -SMA was detected by immunofluorescence staining in PLFs cells transfected with UHRF1 siRNA, and its negative control (NC) siRNA was then treated with 5 ng/ml TGF- $\beta$ 1 for 48 h.  $\alpha$ -SMA stained red; DAPI stained blue. (E-F) Cell proliferation of PLFs transfected with UHRF1 siRNA and its negative control (NC) siRNA, assessed by EdU assays. Data are shown as mean  $\pm$  SEM (n = 3 in each group). (G) CCK8 assays were performed to evaluate cell proliferative ability in MRC-5 and PLFs transfected with UHRF1 siRNA, and its negative control (NC) siRNA was then treated with 5 ng/ml TGF- $\beta$ 1 for 48 h. Data are shown as mean  $\pm$  SEM (n = 3 in each group). (B and F-G) *P* values were from a one-way ANOVA post hoc test with Tukey correction.

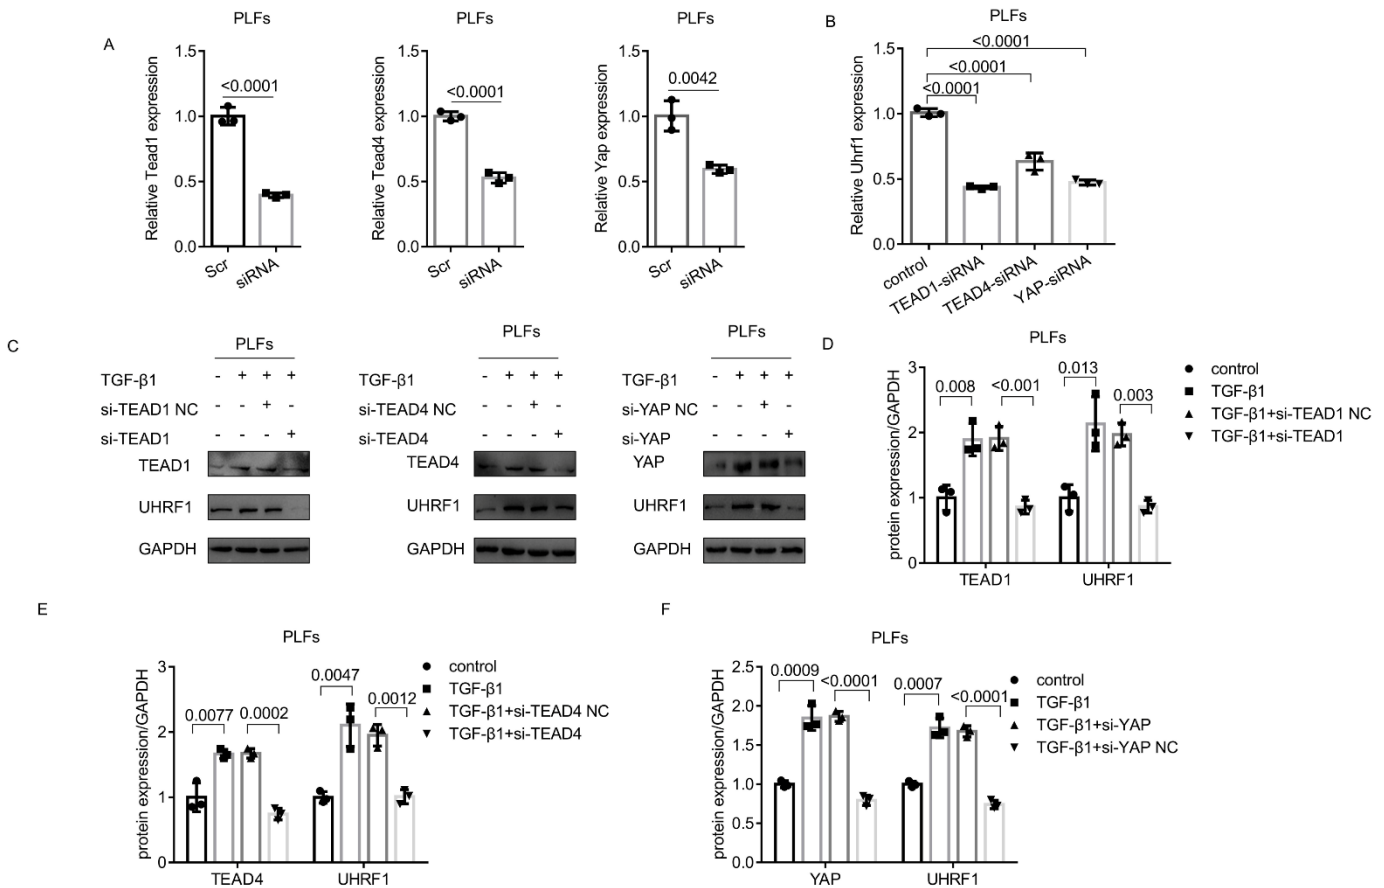

**Fig. S3. YAP-TEAD pathway contributes to the expression of UHRF1 in fibroblast activation.**

(A) Target siRNA transfection significantly decreased the expression of TEAD1, TEAD4, and YAP in PLFs. Data are shown as mean  $\pm$  SEM (n = 3 in each group). (B) Qrt-PCR detection of UHRF1 expression in PLFs after transfected with TEAD1, TEAD4, and YAP siRNA. Data are shown as mean  $\pm$  SEM (n = 3 in each group). (C-F) Western blot and corresponding densitometry analysis of TEAD1, TEAD4,

YAP and UHRF1 in PLFs transfected with TEAD1, TEAD4, and YAP siRNA, and their negative control (NC) siRNA then treated with 5 ng/ml TGF- $\beta$ 1 for 48 h. Data are shown as mean  $\pm$  SEM (n = 3 in each group). (A) *P* values were from a two-tailed unpaired Student *t*-test. (B and D-F) *P* values were from a one-way ANOVA post hoc test with Tukey correction.

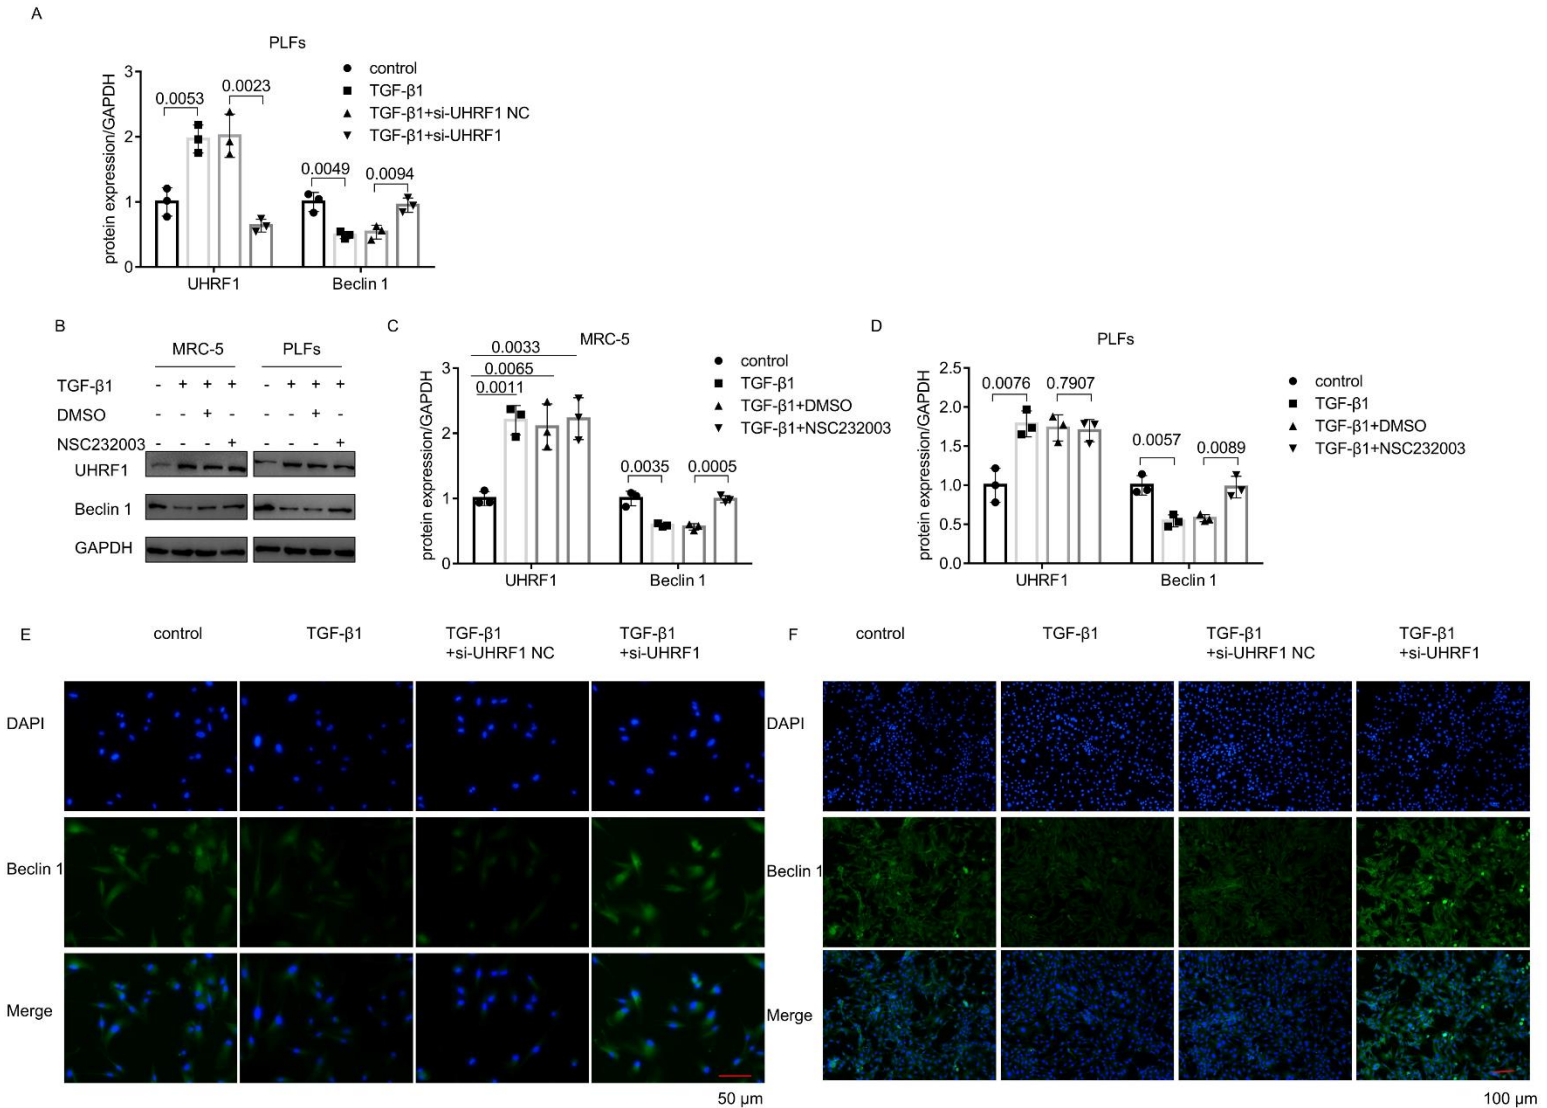

**Fig. S4. UHRF1 epigenetically mediates Beclin 1 methylation in lung fibroblasts**

(A) Corresponding densitometry analysis of UHRF1 and Beclin 1 in PLFs

transfected with UHRF1 siRNA, and its negative control (NC) siRNA was then treated with 5 ng/mL TGF- $\beta$ 1 for 48 h. Data are shown as mean  $\pm$  SEM (n = 3 in each group). (B-D) Western blot and corresponding densitometry analysis of UHRF1 and Beclin 1 in MRC-5 cells and PLFs treated with UHRF1 inhibitor NSC2320003 and its negative control (NC). Data are shown as mean  $\pm$  SEM (n = 3 in each group). (E-F) The expression of Beclin 1 was detected by immunofluorescence staining in MRC-5 cells and PLFs cells transfected with UHRF1 siRNA, and its negative control (NC) siRNA was then treated with 5 ng/mL TGF- $\beta$ 1 for 48 h. Beclin 1 stained green; DAPI stained blue. (A and C-D) *P* values were from a one-way ANOVA post hoc test with Tukey correction.

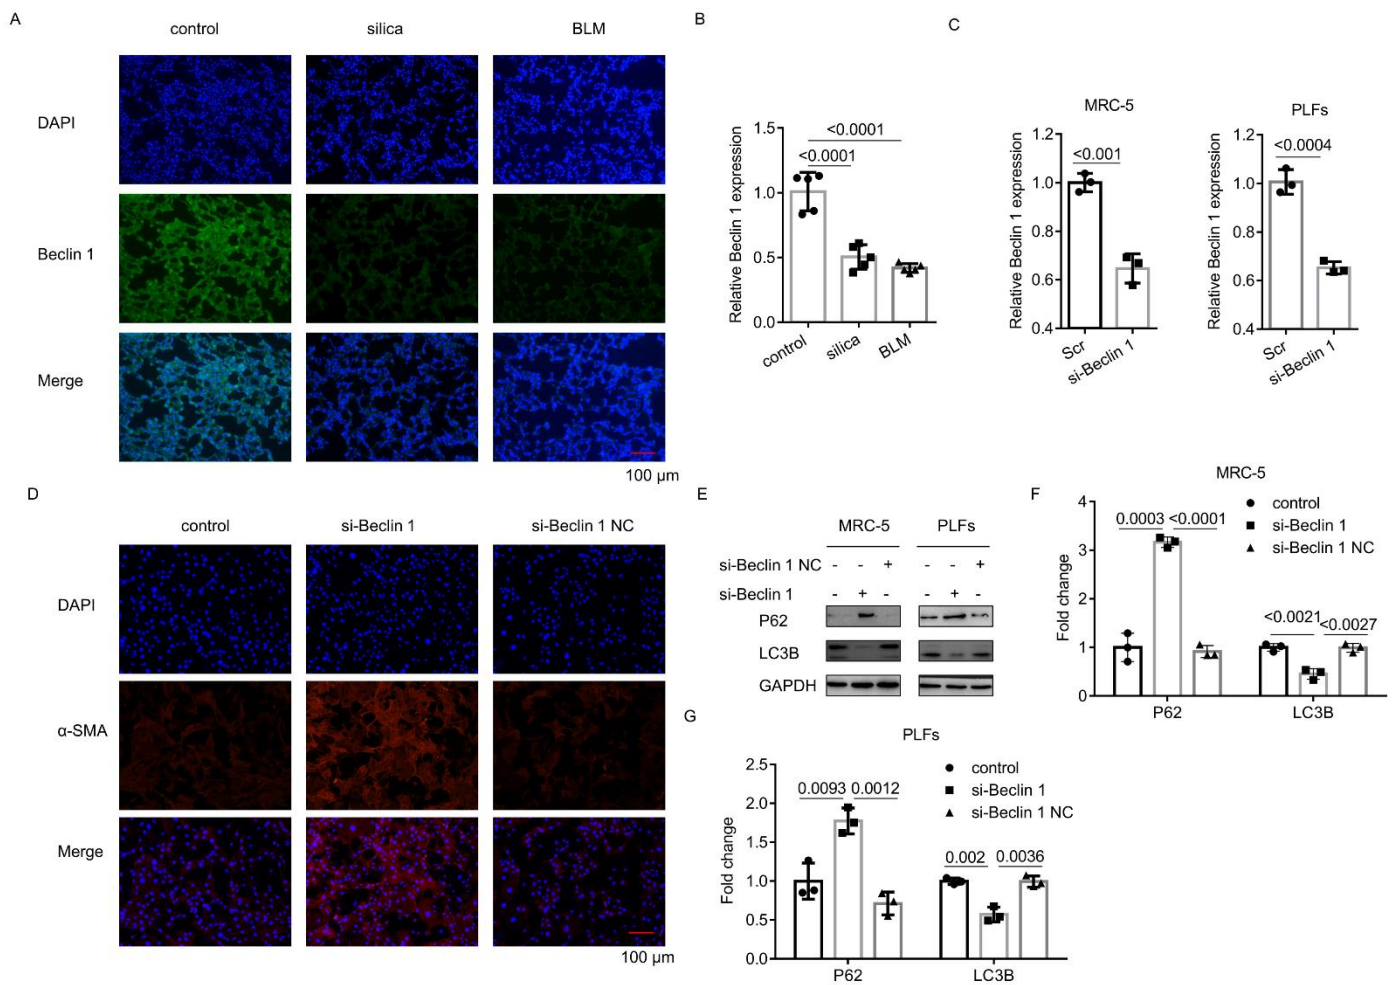

**Fig. S5. Beclin 1 is a functional downstream gene of UHRF1 and negatively regulates cell proliferation.**

(A) Immunofluorescence staining of Beclin 1 in silica or BLM-treated lung tissues. Beclin 1 stained green; DAPI stained blue. (B) qRT-PCR detection of Beclin 1 expression in silica or BLM treated lung tissues. Data are shown as mean  $\pm$  SEM (n = 5 in each group). (C) qRT-PCR analysis of Beclin 1 expression in MRC-5 cells and PLFs after transfected with Beclin 1 siRNA or its negative control (NC) siRNA. Data are shown as mean  $\pm$  SEM (n = 3 in each group). (D) The expression of  $\alpha$ -

SMA was detected by immunofluorescence staining in PLFs cells after being transfected with Beclin 1 siRNA or its negative control (NC) siRNA.  $\alpha$ -SMA stained red; DAPI stained blue. (E-G) Western blot and corresponding densitometry analysis of P62 and LC3B in MRC-5 cells and PLFs after being transfected with Beclin 1 siRNA or its negative control (NC) siRNA. Data are shown as mean  $\pm$  SEM (n = 3 in each group). (C) *P* values were from a two-tailed unpaired Student *t*-test. (B and F-G) *P* values were from a one-way ANOVA post hoc test with Tukey correction.

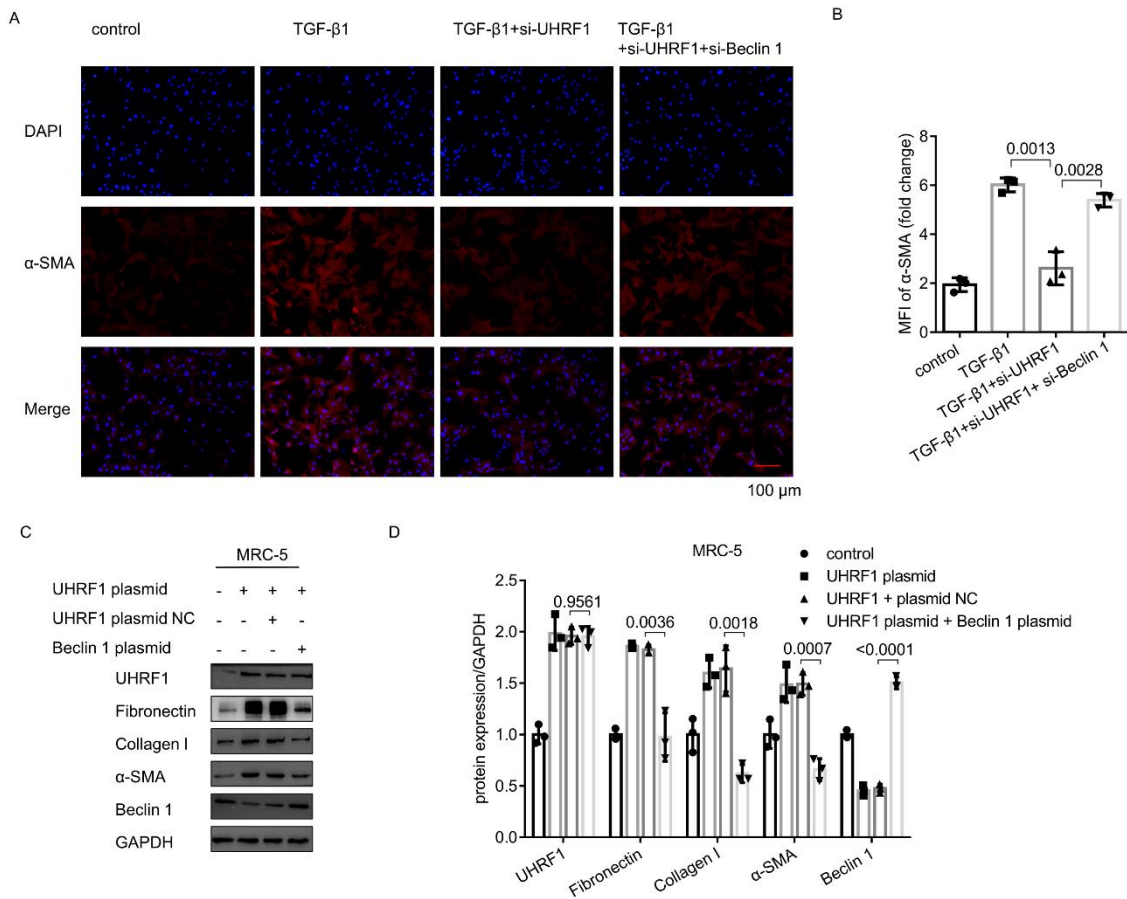



**Fig. S6. Loss-and gain-of-functions of Beclin 1 reversed the effect of UHRF1 in fibroblasts.**

(A) The expression of  $\alpha$ -SMA was detected by immunofluorescence staining in PLFs cells for the indicated groups.  $\alpha$ -SMA stained red; DAPI stained blue. (B) Mean fluorescence intensity of  $\alpha$ -SMA in PLFs from the different groups. Data are shown as mean  $\pm$  SEM (n = 3 in each group). (C-D) Western blot and corresponding densitometry analysis of UHRF1, Fibronectin, Collagen I,  $\alpha$ -SMA and Beclin 1 in MRC-5 cells treated with different treatment. Data are shown as mean  $\pm$  SEM (n = 3 in each group). (B and D) *P* values were from a one-way ANOVA post hoc test with Tukey correction.

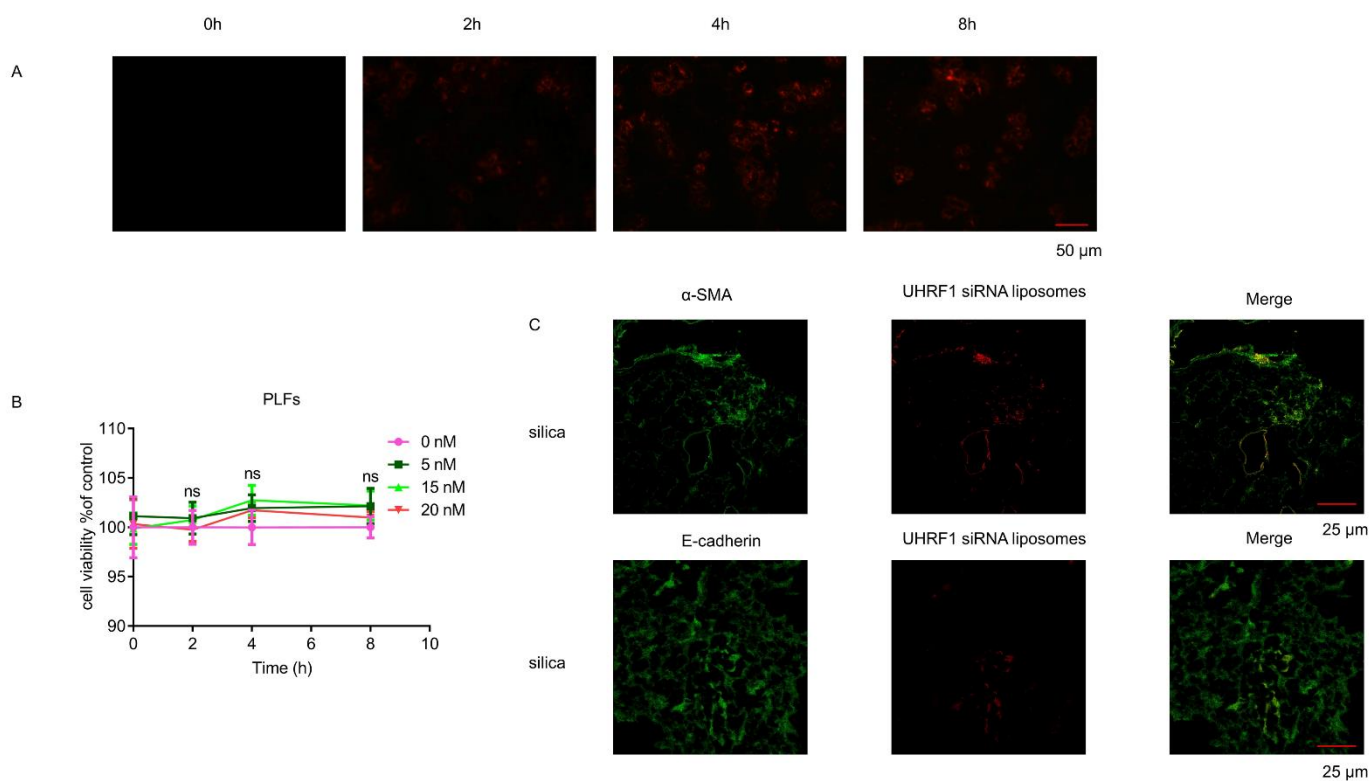

**Fig. S7. The characterization of UHRF1 siRNA-loaded liposomes.**

(A) Immunofluorescence of UHRF1 siRNA-loaded liposomes in fibroblasts, DiR-labeled liposomes marked red. (B) CCK8 assays were performed to evaluate the effect of UHRF1 siRNA-loaded liposomes on fibroblasts. (C) Representative results for co-immunostaining of liposomes and  $\alpha$ -SMA (the marker of fibroblast) or E-cadherin (the marker of epithelial cells) in the mouse lung tissues treated with silica. Red represents liposomes; Green represents  $\alpha$ -SMA or E-cadherin.

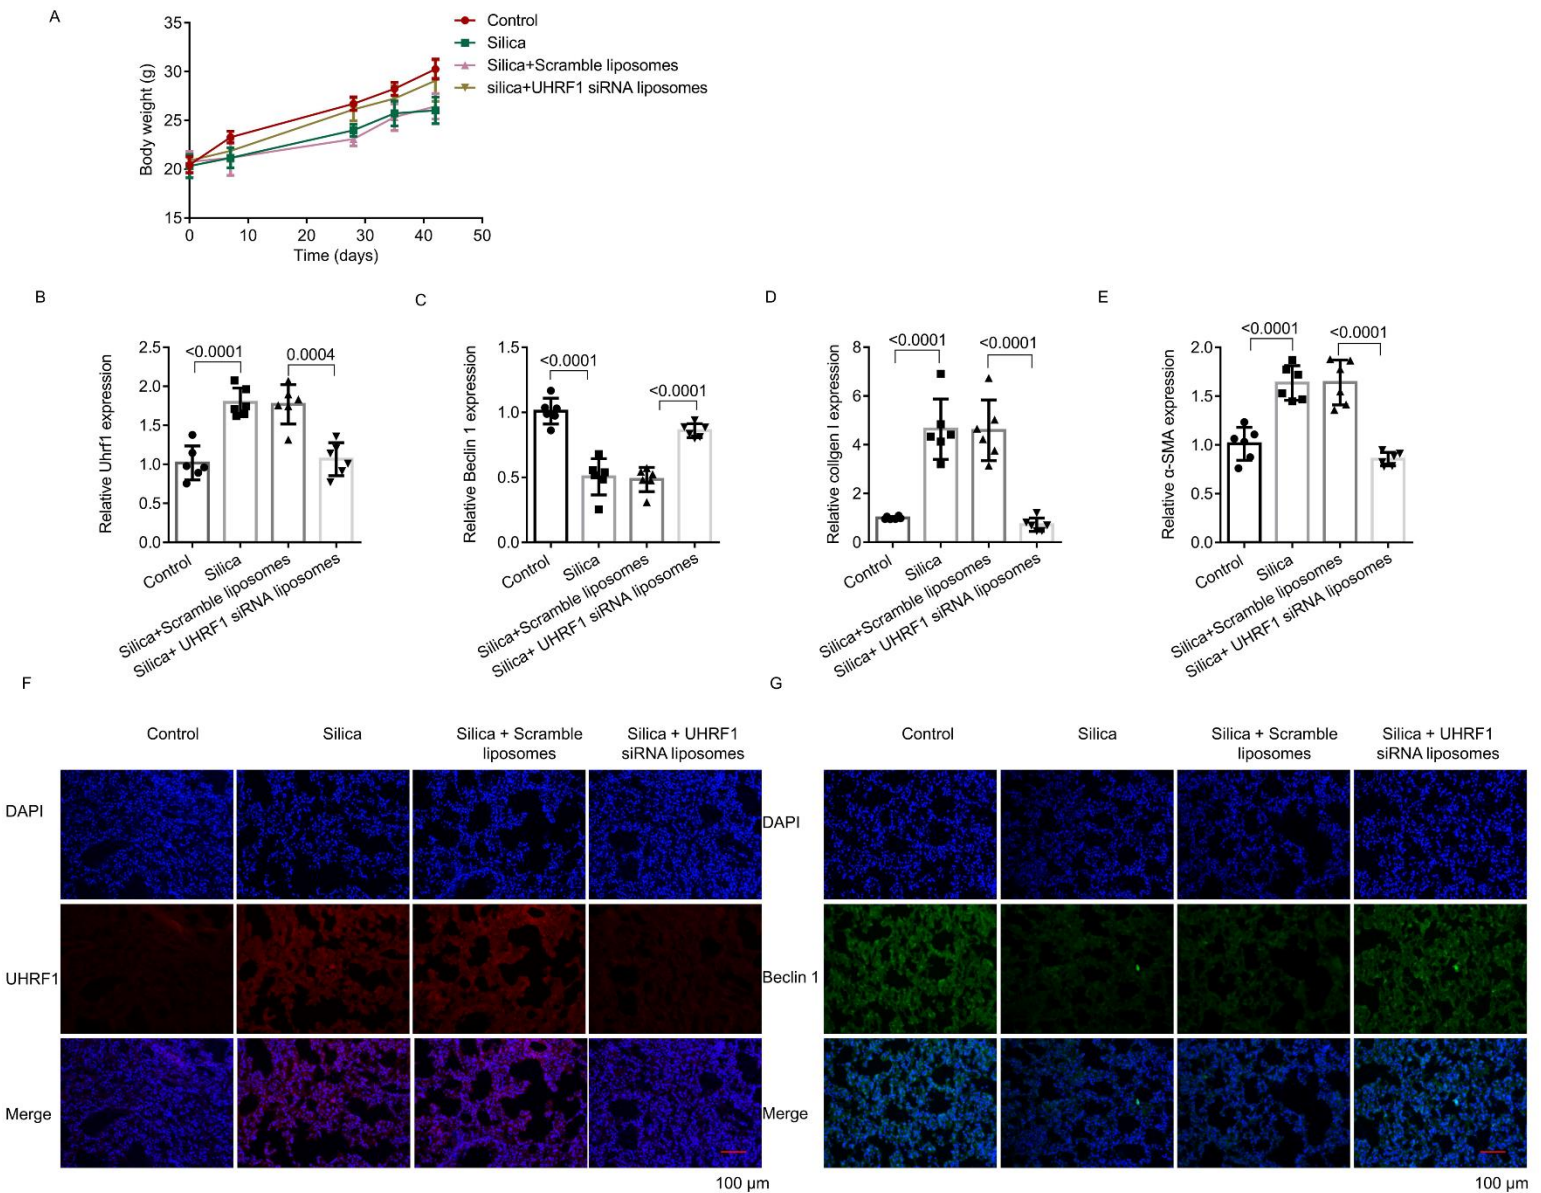

**Fig. S8. Administration of UHRF1 siRNA liposomes attenuates silica-induced pulmonary fibrosis in mice.**

(A) The body weight of the mice in each group,  $n = 6$  in each group. (B-E) qRT-PCR detection of UHRF1, Beclin 1,  $\alpha$ -SMA and Collagen I expression in lung tissues in the different groups. Data are shown as mean  $\pm$  SEM ( $n = 6$  in each group). (F-G) Immunohistochemical staining of UHRF1 and Beclin 1 in mouse lung tissues for the indicated groups. UHRF1 stained red; Beclin 1 stained green; DAPI stained blue. (B-E)  $P$  values were from a one-way ANOVA post hoc test with Tukey

correction.

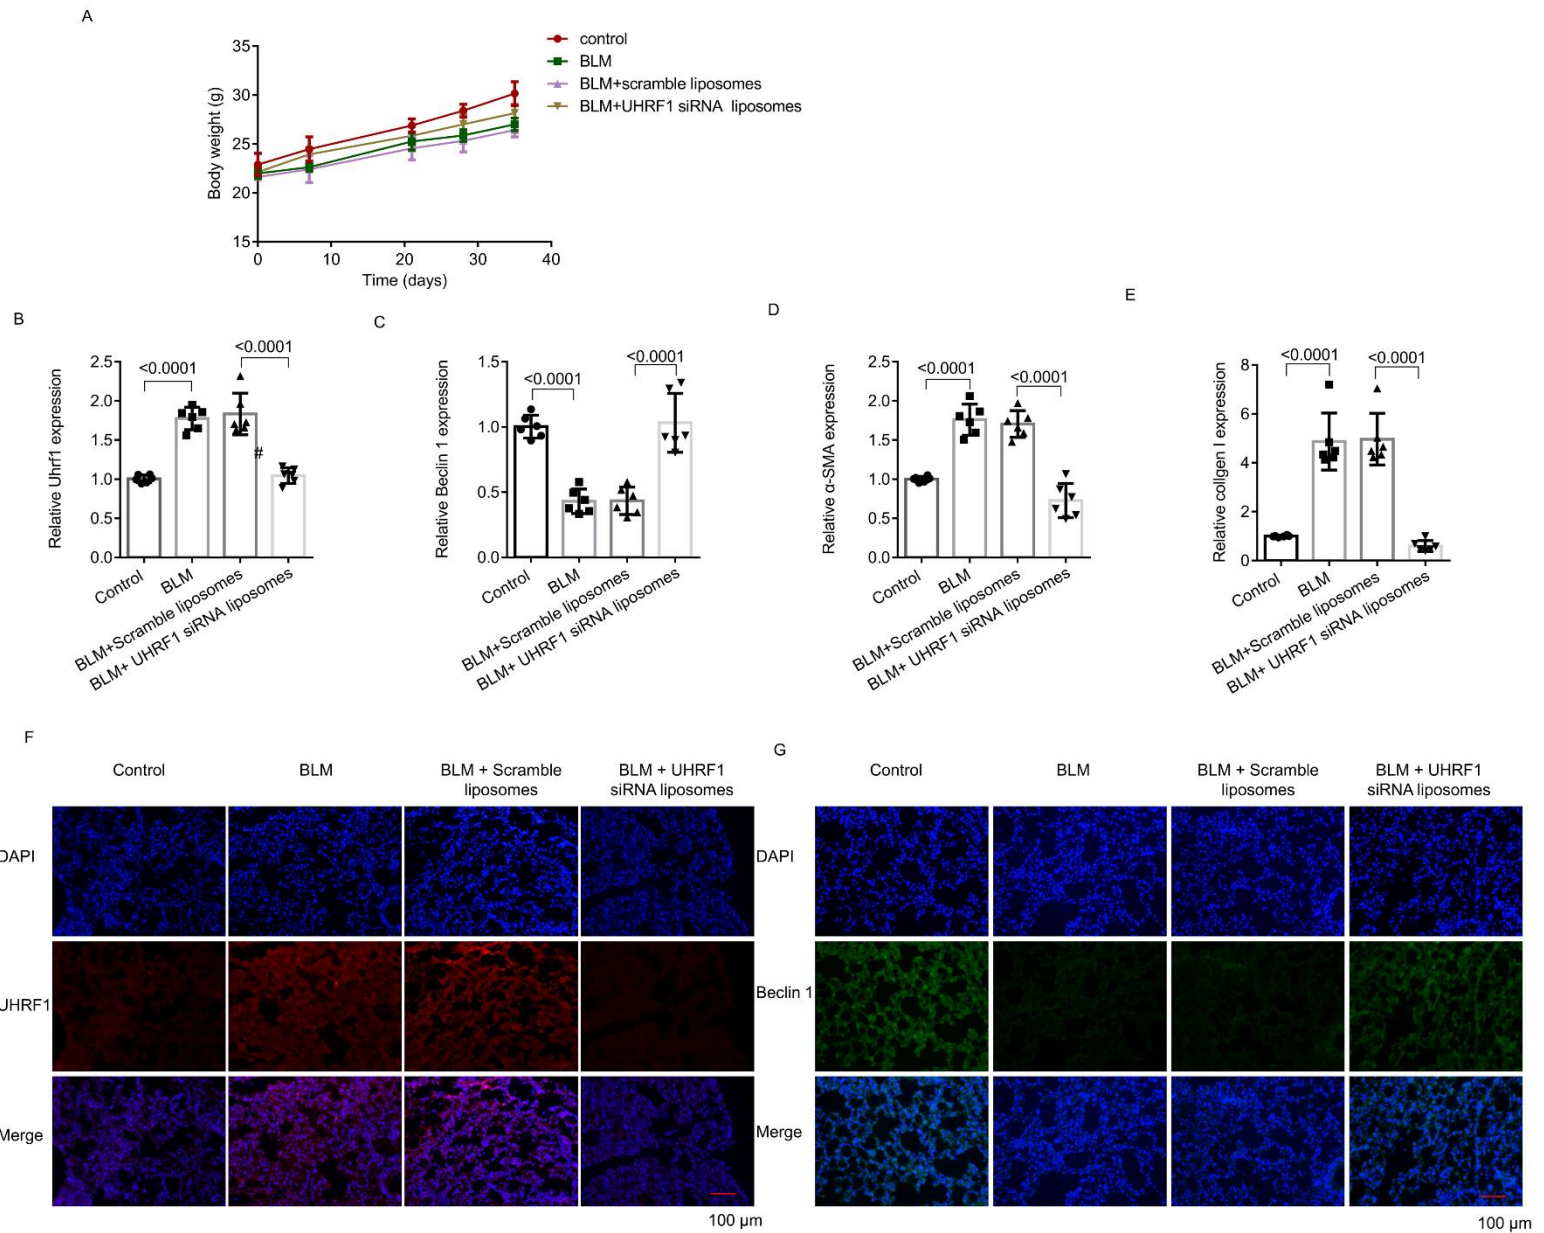

**Fig. S9. Administration of UHRF1 siRNA liposomes attenuates BLM-induced pulmonary fibrosis in mice.**

(A) The body weight of the mice in each group,  $n = 6$  in each group. (B-E) The expression of UHRF1, Beclin 1,  $\alpha$ -SMA and Collagen I expression in lung tissues was detected by qRT-PCR assay. Data are shown as mean  $\pm$  SEM ( $n = 6$  in each group). (F-G) Immunohistochemical staining of UHRF1 and Beclin 1 in mouse lung tissues for the indicated groups. UHRF1 stained red; Beclin 1 stained green; DAPI

stained blue. (B-E) *P* values were from a one-way ANOVA post hoc test with Tukey correction.

Supplementary table1

| Genn Name       | Forward primer (5'-3') | Reverse primer (3'-5') |
|-----------------|------------------------|------------------------|
| UHRF1 (Homo)    | AACTGCTTTGCTCCCATCA    | TCTTGCCACCCTTGACATT    |
| Beclin 1 (Homo) | GGATGGTGTCTCTCGCA      | CAGTCTTCGGCTGAGGTT     |
| TEAD1 (Homo)    | AGAAAGTTGAGGCCAGAGG    | GGACCAAAGTGGCAGGA      |
| TEAD4 (Homo)    | CCACAAGCTCAAGCACCTC    | TCACTGGCTGACACCTCAA    |
| YAP (Homo)      | CCGTTTCCCAGACTACCTT    | TTGGCATCAGCTCCTCTC     |
| GAPDH (Homo)    | CCTTCCGTGTCCCCACT      | GCCTGCTTCACCACCTTC     |
| Uhrf1 (Mus)     | CCAAGAATGTCCGTGCTC     | GGTTTGGCGCTTCCTAC      |
| Beclin 1 (Mus)  | CTGTAGCCAGCCTCTGAAA    | CCTCTTCCTCCTGGGTCT     |
| Tead1 (Mus)     | GACACACGCACCTCTTTG     | GGATGAGGGATGCTGCT      |
| Tead4 (Mus)     | TGCAGAAAGAACAAAGCCA    | CATCGGTGCCTGAGAATG     |
| Yap (Mus)       | GCTTCCCCGACTACCTG      | CACAGACTCCACGTCCAA     |
| Gapdh (Mus)     | TGTTTCCTCGTCCCGTAGA    | ATCTCCACTTTGCCACTGC    |

## Primer Sequence for RT-qPCR

| Gene Name | sense                 | antisense             |
|-----------|-----------------------|-----------------------|
| UHRF1     | AGACGGAAUUGGGGCUGUATT | UACAGCCCCAAUUCCGUCUTT |
| Beclin 1  | CUGGACACGAGUUUCAAGATT | UCUUGAAACUCGUGUCCAGTT |

Sequences of UHRF1 siRNA and Beclin 1 siRNA

Supplementary table2

---

| Primers          | Sequence (5'-3')    |
|------------------|---------------------|
| UHRF1 -CHIP-F    | CGCGGAACAGTCTTGTGA  |
| UHRF1 -CHIP-R    | GGCCCCTTCTTGGTCATT  |
| Beclin 1 -CHIP-F | CTCAGGAGAGGAGCCATTT |
| Beclin 1 -CHIP-R | CTGCGAGAGACACCATCC  |

---

Primer Sequence for ChIP-qPCR

Supplementary table3

---

| Primers     | Sequence (5'-3')             |
|-------------|------------------------------|
| Beclin 1(M) | F: TTTGGAGTAGTTGGGATTATAGGC  |
|             | R: AAAAACCAAACAAAATTACTCACG  |
| Beclin 1(U) | F: TTTGGAGTAGTTGGGATTATAGGTG |
|             | R: AAAAACCAAACAAAATTACTCACAC |

---

Primer Sequence for MSP

M: methylation; U: unmethylation
